# Supplementary material for: Comprehensive Analysis of the Expression and Clinical Significance of RAS Family Members in Non-Small Cell Lung Cancer Based on Bioinformatics Data and the A549 Cell Line Model
Source: MDPI journal article supplement (doi:10.3390/app13010166), 2022-12-23
Supplement: s1 [file s1]

**Table S1.** Statistical significance of *KRAS* and *HRAS* expression levels in patients with NSCLC for all figures from UALCAN and TNMplot databases.

| Figure | Gene | NSCLC<br>subtype | Database | Comparison          | N          | Min          | Q1             | Med            | Q3             | Max            | Upper<br>Whisker | p value                       |
|--------|------|------------------|----------|---------------------|------------|--------------|----------------|----------------|----------------|----------------|------------------|-------------------------------|
| 2A     | KRAS | LUAD             | TNMplot  | Normal vs.<br>Tumor | 486<br>524 | 290<br>262   | 724<br>877     | 931<br>1358.5  | 1268<br>2219.5 | 5377<br>50410  | 2006<br>4230     | <b>3.74x10<sup>-23</sup></b>  |
| 2B     | KRAS | LUSC             | TNMplot  | Normal vs.<br>Tumor | 476<br>501 | 373<br>259   | 756.5<br>980   | 983.5<br>1364  | 1253.5<br>1999 | 6472<br>21630  | 1992<br>3475     | <b>5.76x10<sup>-30</sup></b>  |
| 2C     | HRAS | LUAD             | TNMplot  | Normal vs.<br>Tumor | 486<br>524 | 175<br>33    | 393<br>324     | 525.5<br>483.5 | 721<br>716.5   | 2843<br>2790   | 1190<br>1282     | <b>9.58x10<sup>-04</sup></b>  |
| 2D     | HRAS | LUSC             | TNMplot  | Normal vs.<br>Tumor | 476<br>501 | 96<br>117    | 414.5<br>689   | 541<br>1024    | 720<br>1522    | 2744<br>6821   | 1169<br>2762     | <b>1.03x10<sup>-62</sup></b>  |
| 3A     | KRAS | LUAD             | UALCAN   | Normal vs.<br>Tumor | 59<br>515  | 8.68<br>5.39 | 12.25<br>14.51 | 14.78<br>19.52 | 17.65<br>26.19 | 25.17<br>47.71 |                  | <b>7.88x10<sup>-13</sup></b>  |
| 3B     | KRAS | LUAD             | UALCAN   | Normal-vs-Stage1    |            |              |                |                |                |                |                  | <b>1.698x10<sup>-13</sup></b> |
| 3B     | KRAS | LUAD             | UALCAN   | Normal-vs-Stage2    |            |              |                |                |                |                |                  | <b>2.09x10<sup>-3</sup></b>   |
| 3B     | KRAS | LUAD             | UALCAN   | Normal-vs-Stage3    |            |              |                |                |                |                |                  | <b>2.08x10<sup>-6</sup></b>   |
| 3B     | KRAS | LUAD             | UALCAN   | Normal-vs-Stage4    |            |              |                |                |                |                |                  | <b>0.01</b>                   |
| 3B     | KRAS | LUAD             | UALCAN   | Stage1-vs-Stage2    |            |              |                |                |                |                |                  | 0.168                         |
| 3B     | KRAS | LUAD             | UALCAN   | Stage1-vs-Stage3    |            |              |                |                |                |                |                  | 0.537                         |
| 3B     | KRAS | LUAD             | UALCAN   | Stage1-vs-Stage4    |            |              |                |                |                |                |                  | 0.847                         |
| 3B     | KRAS | LUAD             | UALCAN   | Stage2-vs-Stage3    |            |              |                |                |                |                |                  | 0.287                         |
| 3B     | KRAS | LUAD             | UALCAN   | Stage2-vs-Stage4    |            |              |                |                |                |                |                  | 0.289                         |
| 3B     | KRAS | LUAD             | UALCAN   | Stage3-vs-Stage4    |            |              |                |                |                |                |                  | 0.869                         |
| 3C     | KRAS | LUAD             | UALCAN   | Normal-vs-Male      |            |              |                |                |                |                |                  | <b>4.88x10<sup>-10</sup></b>  |
| 3C     | KRAS | LUAD             | UALCAN   | Normal-vs-Female    |            |              |                |                |                |                |                  | <b>1.79x10<sup>-06</sup></b>  |

|    |      |      |        |                                      |                               |
|----|------|------|--------|--------------------------------------|-------------------------------|
| 3C | KRAS | LUAD | UALCAN | Male-vs-Female                       | 0.857                         |
| 3D | KRAS | LUAD | UALCAN | Normal-vs-Age(21-40Yrs)              | 0.242                         |
| 3D | KRAS | LUAD | UALCAN | Normal-vs-Age(41-60Yrs)              | <b>1.20 x10<sup>-03</sup></b> |
| 3D | KRAS | LUAD | UALCAN | Normal-vs-Age(61-80Yrs)              | <b>9.53 x10<sup>-12</sup></b> |
| 3D | KRAS | LUAD | UALCAN | Normal-vs-Age(81-100Yrs)             | <b>1.42 x10<sup>-03</sup></b> |
| 3D | KRAS | LUAD | UALCAN | Age(21-40Yrs)-vs-Age(41-60Yrs)       | 0.306                         |
| 3D | KRAS | LUAD | UALCAN | Age(21-40Yrs)-vs-Age(61-80Yrs)       | 0.777                         |
| 3D | KRAS | LUAD | UALCAN | Age(21-40Yrs)-vs-Age(81-100Yrs)      | 0.402                         |
| 3D | KRAS | LUAD | UALCAN | Age(41-60Yrs)-vs-Age(61-80Yrs)       | 0.433                         |
| 3D | KRAS | LUAD | UALCAN | Age(41-60Yrs)-vs-Age(81-100Yrs)      | 0.514                         |
| 3D | KRAS | LUAD | UALCAN | Age(61-80Yrs)-vs-Age(81-100Yrs)      | 0.119                         |
| 3E | KRAS | LUAD | UALCAN | Normal-vs-Non smoker                 | <b>1.32 x10<sup>-3</sup></b>  |
| 3E | KRAS | LUAD | UALCAN | Normal-vs-Smoker                     | <b>1.35 x10<sup>-4</sup></b>  |
| 3E | KRAS | LUAD | UALCAN | Normal-vs-Reformed smoker1           | <b>9.69 x10<sup>-11</sup></b> |
| 3E | KRAS | LUAD | UALCAN | Normal-vs-Reformed smoker2           | <b>1.38x10<sup>-4</sup></b>   |
| 3E | KRAS | LUAD | UALCAN | Non smoker-vs-Smoker                 | <b>0.019</b>                  |
| 3E | KRAS | LUAD | UALCAN | Non smoker-vs-Reformed smoker1       | <b>4.09x10<sup>-3</sup></b>   |
| 3E | KRAS | LUAD | UALCAN | Non smoker-vs-Reformed smoker2       | <b>0.015</b>                  |
| 3E | KRAS | LUAD | UALCAN | Smoker-vs-Reformed smoker1           | 0.448                         |
| 3E | KRAS | LUAD | UALCAN | Smoker-vs-Reformed smoker2           | 0.848                         |
| 3E | KRAS | LUAD | UALCAN | Reformed smoker1-vs-Reformed smoker2 | 0.343                         |
| 3F | KRAS | LUAD | UALCAN | Normal-vs-N0                         | <b>1.91x10<sup>-8</sup></b>   |
| 3F | KRAS | LUAD | UALCAN | Normal-vs-N1                         | <b>4.73x10<sup>-6</sup></b>   |
| 3F | KRAS | LUAD | UALCAN | Normal-vs-N2                         | <b>1.65x10<sup>-5</sup></b>   |

|    |      |      |        |                          |                               |
|----|------|------|--------|--------------------------|-------------------------------|
| 3F | KRAS | LUAD | UALCAN | Normal-vs-N3             | 0.797                         |
| 3F | KRAS | LUAD | UALCAN | N0-vs-N1                 | 0.248                         |
| 3F | KRAS | LUAD | UALCAN | N0-vs-N2                 | 0.493                         |
| 3F | KRAS | LUAD | UALCAN | N0-vs-N3                 | 0.673                         |
| 3F | KRAS | LUAD | UALCAN | N1-vs-N2                 | 0.672                         |
| 3F | KRAS | LUAD | UALCAN | N1-vs-N3                 | 0.527                         |
| 3F | KRAS | LUAD | UALCAN | N2-vs-N3                 | 0.473                         |
| 4A | KRAS | LUSC | UALCAN | Normal-vs-tumor          | <b>&lt;1x10<sup>-12</sup></b> |
| 4B | KRAS | LUSC | UALCAN | Normal-vs-Stage1         | <b>2.55x10<sup>-15</sup></b>  |
| 4B | KRAS | LUSC | UALCAN | Normal-vs-Stage2         | <b>2.91x10<sup>-7</sup></b>   |
| 4B | KRAS | LUSC | UALCAN | Normal-vs-Stage3         | <b>8.84x10<sup>-4</sup></b>   |
| 4B | KRAS | LUSC | UALCAN | Normal-vs-Stage4         | <b>0.012</b>                  |
| 4B | KRAS | LUSC | UALCAN | Stage1-vs-Stage2         | 0.782                         |
| 4B | KRAS | LUSC | UALCAN | Stage1-vs-Stage3         | 0.824                         |
| 4B | KRAS | LUSC | UALCAN | Stage1-vs-Stage4         | <b>0.013</b>                  |
| 4B | KRAS | LUSC | UALCAN | Stage2-vs-Stage3         | 0.978                         |
| 4B | KRAS | LUSC | UALCAN | Stage2-vs-Stage4         | <b>0.016</b>                  |
| 4B | KRAS | LUSC | UALCAN | Stage3-vs-Stage4         | 0.054                         |
| 4C | KRAS | LUSC | UALCAN | Normal-vs-Male           | <b>1.62x10<sup>-12</sup></b>  |
| 4C | KRAS | LUSC | UALCAN | Normal-vs-Female         | <b>3.81x10<sup>-12</sup></b>  |
| 4C | KRAS | LUSC | UALCAN | Male-vs-Female           | <b>1.20x10<sup>-3</sup></b>   |
| 4D | KRAS | LUSC | UALCAN | Normal-vs-Age(21-40Yrs)  | 0.052                         |
| 4D | KRAS | LUSC | UALCAN | Normal-vs-Age(41-60Yrs)  | <b>2.02x10<sup>-7</sup></b>   |
| 4D | KRAS | LUSC | UALCAN | Normal-vs-Age(61-80Yrs)  | <b>1.62x10<sup>-12</sup></b>  |
| 4D | KRAS | LUSC | UALCAN | Normal-vs-Age(81-100Yrs) | <b>2.80x10<sup>-3</sup></b>   |

|    |      |      |        |                                         |                              |
|----|------|------|--------|-----------------------------------------|------------------------------|
| 4D | KRAS | LUSC | UALCAN | Age(21-40Yrs)-vs-Age(41-60Yrs)          | 0.653                        |
| 4D | KRAS | LUSC | UALCAN | Age(21-40Yrs)-vs-Age(61-80Yrs)          | 0.735                        |
| 4D | KRAS | LUSC | UALCAN | Age(21-40Yrs)-vs-Age(81-100Yrs)         | 0.968                        |
| 4D | KRAS | LUSC | UALCAN | Age(41-60Yrs)-vs-Age(61-80Yrs)          | 0.340                        |
| 4D | KRAS | LUSC | UALCAN | Age(41-60Yrs)-vs-Age(81-100Yrs)         | <b>9.86x10<sup>-3</sup></b>  |
| 4D | KRAS | LUSC | UALCAN | Age(61-80Yrs)-vs-Age(81-100Yrs)         | <b>0.013</b>                 |
| 4E | KRAS | LUSC | UALCAN | Normal-vs-Non smoker                    | <b>0.048</b>                 |
| 4E | KRAS | LUSC | UALCAN | Normal-vs-Smoker                        | <b>3.17x10<sup>-8</sup></b>  |
| 4E | KRAS | LUSC | UALCAN | Normal-vs-Reformed smoker1              | <b>1.03x10<sup>-7</sup></b>  |
| 4E | KRAS | LUSC | UALCAN | Normal-vs-Reformed smoker2              | <b>1.65x10<sup>-11</sup></b> |
| 4E | KRAS | LUSC | UALCAN | Non smoker-vs-Smoker                    | <b>1.75x10<sup>-4</sup></b>  |
| 4E | KRAS | LUSC | UALCAN | Non smoker-vs-Reformed smoker1          | 0.206                        |
| 4E | KRAS | LUSC | UALCAN | Non smoker-vs-Reformed smoker2          | <b>1.22x10<sup>-3</sup></b>  |
| 4E | KRAS | LUSC | UALCAN | Smoker-vs-Reformed smoker1              | <b>2.24x10<sup>-3</sup></b>  |
| 4E | KRAS | LUSC | UALCAN | Smoker-vs-Reformed smoker2              | 0.131                        |
| 4E | KRAS | LUSC | UALCAN | Reformed smoker1-vs-Reformed<br>smoker2 | <b>0.020</b>                 |
| 4F | KRAS | LUSC | UALCAN | Normal-vs-N0                            | <b>1.44x10<sup>-15</sup></b> |
| 4F | KRAS | LUSC | UALCAN | Normal-vs-N1                            | <b>1.96x10<sup>-6</sup></b>  |
| 4F | KRAS | LUSC | UALCAN | Normal-vs-N2                            | <b>3.82x10<sup>-5</sup></b>  |
| 4F | KRAS | LUSC | UALCAN | Normal-vs-N3                            | 0.153                        |
| 4F | KRAS | LUSC | UALCAN | N0-vs-N1                                | 0.435                        |
| 4F | KRAS | LUSC | UALCAN | N0-vs-N2                                | 0.287                        |
| 4F | KRAS | LUSC | UALCAN | N0-vs-N3                                | 0.666                        |
| 4F | KRAS | LUSC | UALCAN | N1-vs-N2                                | 0.154                        |

|    |      |      |        |                                 |                             |
|----|------|------|--------|---------------------------------|-----------------------------|
| 4F | KRAS | LUSC | UALCAN | N1-vs-N3                        | 0.193                       |
| 4F | KRAS | LUSC | UALCAN | N2-vs-N3                        | 0.724                       |
| 5A | HRAS | LUAD | UALCAN | Normal-vs-tumor                 | <b>6.32x10<sup>-9</sup></b> |
| 5B | HRAS | LUAD | UALCAN | Normal-vs-Stage1                | <b>5.30x10<sup>-7</sup></b> |
| 5B | HRAS | LUAD | UALCAN | Normal-vs-Stage2                | <b>1.46x10<sup>-3</sup></b> |
| 5B | HRAS | LUAD | UALCAN | Normal-vs-Stage3                | <b>7.74x10<sup>-5</sup></b> |
| 5B | HRAS | LUAD | UALCAN | Normal-vs-Stage4                | 0.254                       |
| 5B | HRAS | LUAD | UALCAN | Stage1-vs-Stage2                | 0.491                       |
| 5B | HRAS | LUAD | UALCAN | Stage1-vs-Stage3                | 0.085                       |
| 5B | HRAS | LUAD | UALCAN | Stage1-vs-Stage4                | 0.870                       |
| 5B | HRAS | LUAD | UALCAN | Stage2-vs-Stage3                | <b>0.043</b>                |
| 5B | HRAS | LUAD | UALCAN | Stage2-vs-Stage4                | 0.936                       |
| 5B | HRAS | LUAD | UALCAN | Stage3-vs-Stage4                | 0.292                       |
| 5C | HRAS | LUAD | UALCAN | Normal-vs-Male                  | <b>5.16x10<sup>-7</sup></b> |
| 5C | HRAS | LUAD | UALCAN | Normal-vs-Female                | <b>2.06x10<sup>-6</sup></b> |
| 5C | HRAS | LUAD | UALCAN | Male-vs-Female                  | 0.214                       |
| 5D | HRAS | LUAD | UALCAN | Normal-vs-Age(21-40Yrs)         | 0.092                       |
| 5D | HRAS | LUAD | UALCAN | Normal-vs-Age(41-60Yrs)         | <b>5.16x10<sup>-7</sup></b> |
| 5D | HRAS | LUAD | UALCAN | Normal-vs-Age(61-80Yrs)         | <b>1.56x10<sup>-5</sup></b> |
| 5D | HRAS | LUAD | UALCAN | Normal-vs-Age(81-100Yrs)        | 0.293                       |
| 5D | HRAS | LUAD | UALCAN | Age(21-40Yrs)-vs-Age(41-60Yrs)  | <b>0.029</b>                |
| 5D | HRAS | LUAD | UALCAN | Age(21-40Yrs)-vs-Age(61-80Yrs)  | 0.966                       |
| 5D | HRAS | LUAD | UALCAN | Age(21-40Yrs)-vs-Age(81-100Yrs) | 0.426                       |
| 5D | HRAS | LUAD | UALCAN | Age(41-60Yrs)-vs-Age(61-80Yrs)  | <b>0.026</b>                |
| 5D | HRAS | LUAD | UALCAN | Age(41-60Yrs)-vs-Age(81-100Yrs) | <b>0.040</b>                |

|    |      |      |        |                                      |                               |
|----|------|------|--------|--------------------------------------|-------------------------------|
| 5D | HRAS | LUAD | UALCAN | Age(61-80Yrs)-vs-Age(81-100Yrs)      | 0.454                         |
| 5E | HRAS | LUAD | UALCAN | Normal-vs-Non smoker                 | <b>0.028</b>                  |
| 5E | HRAS | LUAD | UALCAN | Normal-vs-Smoker                     | <b>3.53x10<sup>-6</sup></b>   |
| 5E | HRAS | LUAD | UALCAN | Normal-vs-Reformed smoker1           | <b>2.58x10<sup>-4</sup></b>   |
| 5E | HRAS | LUAD | UALCAN | Normal-vs-Reformed smoker2           | <b>1.23x10<sup>-4</sup></b>   |
| 5E | HRAS | LUAD | UALCAN | Non smoker-vs-Smoker                 | <b>0.028</b>                  |
| 5E | HRAS | LUAD | UALCAN | Non smoker-vs-Reformed smoker1       | 0.599                         |
| 5E | HRAS | LUAD | UALCAN | Non smoker-vs-Reformed smoker2       | 0.448                         |
| 5E | HRAS | LUAD | UALCAN | Smoker-vs-Reformed smoker1           | <b>0.042</b>                  |
| 5E | HRAS | LUAD | UALCAN | Smoker-vs-Reformed smoker2           | 0.085                         |
| 5E | HRAS | LUAD | UALCAN | Reformed smoker1-vs-Reformed smoker2 | 0.715                         |
| 5F | HRAS | LUAD | UALCAN | Normal-vs-N0                         | <b>4.21x10<sup>-8</sup></b>   |
| 5F | HRAS | LUAD | UALCAN | Normal-vs-N1                         | <b>4.02x10<sup>-3</sup></b>   |
| 5F | HRAS | LUAD | UALCAN | Normal-vs-N2                         | <b>3.20x10<sup>-3</sup></b>   |
| 5F | HRAS | LUAD | UALCAN | Normal-vs-N3                         | 0.536                         |
| 5F | HRAS | LUAD | UALCAN | N0-vs-N1                             | 0.725                         |
| 5F | HRAS | LUAD | UALCAN | N0-vs-N2                             | 0.459                         |
| 5F | HRAS | LUAD | UALCAN | N0-vs-N3                             | 0.461                         |
| 5F | HRAS | LUAD | UALCAN | N1-vs-N2                             | 0.397                         |
| 5F | HRAS | LUAD | UALCAN | N1-vs-N3                             | 0.490                         |
| 5F | HRAS | LUAD | UALCAN | N2-vs-N3                             | 0.718                         |
| 6A | HRAS | LUSC | UALCAN | Normal-vs-tumor                      | <b>&lt;1x10<sup>-12</sup></b> |
| 6B | HRAS | LUSC | UALCAN | Normal-vs-Stage1                     | <b>&lt;1x10<sup>-12</sup></b> |
| 6B | HRAS | LUSC | UALCAN | Normal-vs-Stage2                     | <b>&lt;1x10<sup>-12</sup></b> |

|    |      |      |        |                                 |                               |
|----|------|------|--------|---------------------------------|-------------------------------|
| 6B | HRAS | LUSC | UALCAN | Normal-vs-Stage3                | <b>1.62x10<sup>-12</sup></b>  |
| 6B | HRAS | LUSC | UALCAN | Normal-vs-Stage4                | <b>0.043</b>                  |
| 6B | HRAS | LUSC | UALCAN | Stage1-vs-Stage2                | 0.329                         |
| 6B | HRAS | LUSC | UALCAN | Stage1-vs-Stage3                | 0.897                         |
| 6B | HRAS | LUSC | UALCAN | Stage1-vs-Stage4                | 0.624                         |
| 6B | HRAS | LUSC | UALCAN | Stage2-vs-Stage3                | 0.429                         |
| 6B | HRAS | LUSC | UALCAN | Stage2-vs-Stage4                | 0.802                         |
| 6B | HRAS | LUSC | UALCAN | Stage3-vs-Stage4                | 0.646                         |
| 6C | HRAS | LUSC | UALCAN | Normal-vs-Male                  | <b>1.62x10<sup>-12</sup></b>  |
| 6C | HRAS | LUSC | UALCAN | Normal-vs-Female                | <b>&lt;1x10<sup>-12</sup></b> |
| 6C | HRAS | LUSC | UALCAN | Male-vs-Female                  | 0.361                         |
| 6D | HRAS | LUSC | UALCAN | Normal-vs-Age(21-40Yrs)         | 0.553                         |
| 6D | HRAS | LUSC | UALCAN | Normal-vs-Age(41-60Yrs)         | <b>1.62x10<sup>-12</sup></b>  |
| 6D | HRAS | LUSC | UALCAN | Normal-vs-Age(61-80Yrs)         | <b>1.62x10<sup>-12</sup></b>  |
| 6D | HRAS | LUSC | UALCAN | Normal-vs-Age(81-100Yrs)        | <b>5.88x10<sup>-8</sup></b>   |
| 6D | HRAS | LUSC | UALCAN | Age(21-40Yrs)-vs-Age(41-60Yrs)  | 0.230                         |
| 6D | HRAS | LUSC | UALCAN | Age(21-40Yrs)-vs-Age(61-80Yrs)  | 0.221                         |
| 6D | HRAS | LUSC | UALCAN | Age(21-40Yrs)-vs-Age(81-100Yrs) | 0.066                         |
| 6D | HRAS | LUSC | UALCAN | Age(41-60Yrs)-vs-Age(61-80Yrs)  | 0.207                         |
| 6D | HRAS | LUSC | UALCAN | Age(41-60Yrs)-vs-Age(81-100Yrs) | 0.503                         |
| 6D | HRAS | LUSC | UALCAN | Age(61-80Yrs)-vs-Age(81-100Yrs) | 0.122                         |
| 6E | HRAS | LUSC | UALCAN | Normal-vs-Non smoker            | <b>5.81x10<sup>-5</sup></b>   |
| 6E | HRAS | LUSC | UALCAN | Normal-vs-Smoker                | <b>&lt;1x10<sup>-12</sup></b> |
| 6E | HRAS | LUSC | UALCAN | Normal-vs-Reformed smoker1      | <b>&lt;1x10<sup>-12</sup></b> |
| 6E | HRAS | LUSC | UALCAN | Normal-vs-Reformed smoker2      | <b>&lt;1x10<sup>-12</sup></b> |

|    |      |      |        |                                      |                               |
|----|------|------|--------|--------------------------------------|-------------------------------|
| 6E | HRAS | LUSC | UALCAN | Non smoker-vs-Smoker                 | <b>2.43x10<sup>-4</sup></b>   |
| 6E | HRAS | LUSC | UALCAN | Non smoker-vs-Reformed smoker1       | <b>0.034</b>                  |
| 6E | HRAS | LUSC | UALCAN | Non smoker-vs-Reformed smoker2       | <b>0.043</b>                  |
| 6E | HRAS | LUSC | UALCAN | Smoker-vs-Reformed smoker1           | <b>0.028</b>                  |
| 6E | HRAS | LUSC | UALCAN | Smoker-vs-Reformed smoker2           | <b>1.32x10<sup>-3</sup></b>   |
| 6E | HRAS | LUSC | UALCAN | Reformed smoker1-vs-Reformed smoker2 | 0.678                         |
| 6F | HRAS | LUSC | UALCAN | Normal-vs-N0                         | <b>&lt;1x10<sup>-12</sup></b> |
| 6F | HRAS | LUSC | UALCAN | Normal-vs-N1                         | <b>&lt;1x10<sup>-12</sup></b> |
| 6F | HRAS | LUSC | UALCAN | Normal-vs-N2                         | <b>6.73x10<sup>-12</sup></b>  |
| 6F | HRAS | LUSC | UALCAN | Normal-vs-N3                         | 0.073                         |
| 6F | HRAS | LUSC | UALCAN | N0-vs-N1                             | 0.898                         |
| 6F | HRAS | LUSC | UALCAN | N0-vs-N2                             | 0.824                         |
| 6F | HRAS | LUSC | UALCAN | N0-vs-N3                             | 0.644                         |
| 6F | HRAS | LUSC | UALCAN | N1-vs-N2                             | 0.775                         |
| 6F | HRAS | LUSC | UALCAN | N1-vs-N3                             | 0.635                         |
| 6F | HRAS | LUSC | UALCAN | N2-vs-N3                             | 0.630                         |

Note: Significance is shown by bold numbers. Abbreviations: LUAD – lung adenocarcinoma; LUSC – lung squamous cell carcinoma; Reformed smoker1: <15 years; Reformed smoker2: > 15 years; N0 - No regional lymph node metastasis; N1 - Metastases in 1 to 3 axillary lymph nodes; N2 - Metastases in 4 to 9 axillary lymph nodes; N3 - Metastases in 10 or more axillary lymph nodes S



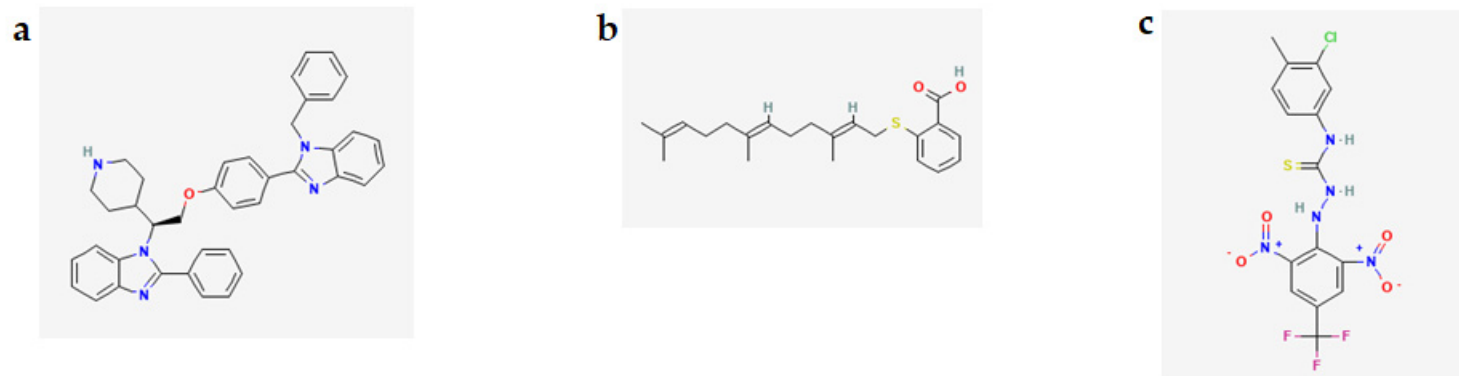

**Figure S1.** The chemical structures of the of the three RAS inhibitors: deltarasin (**a**), farnesylthiosalicylic acid (**b**), Kobe0065 (**c**) [22–24].

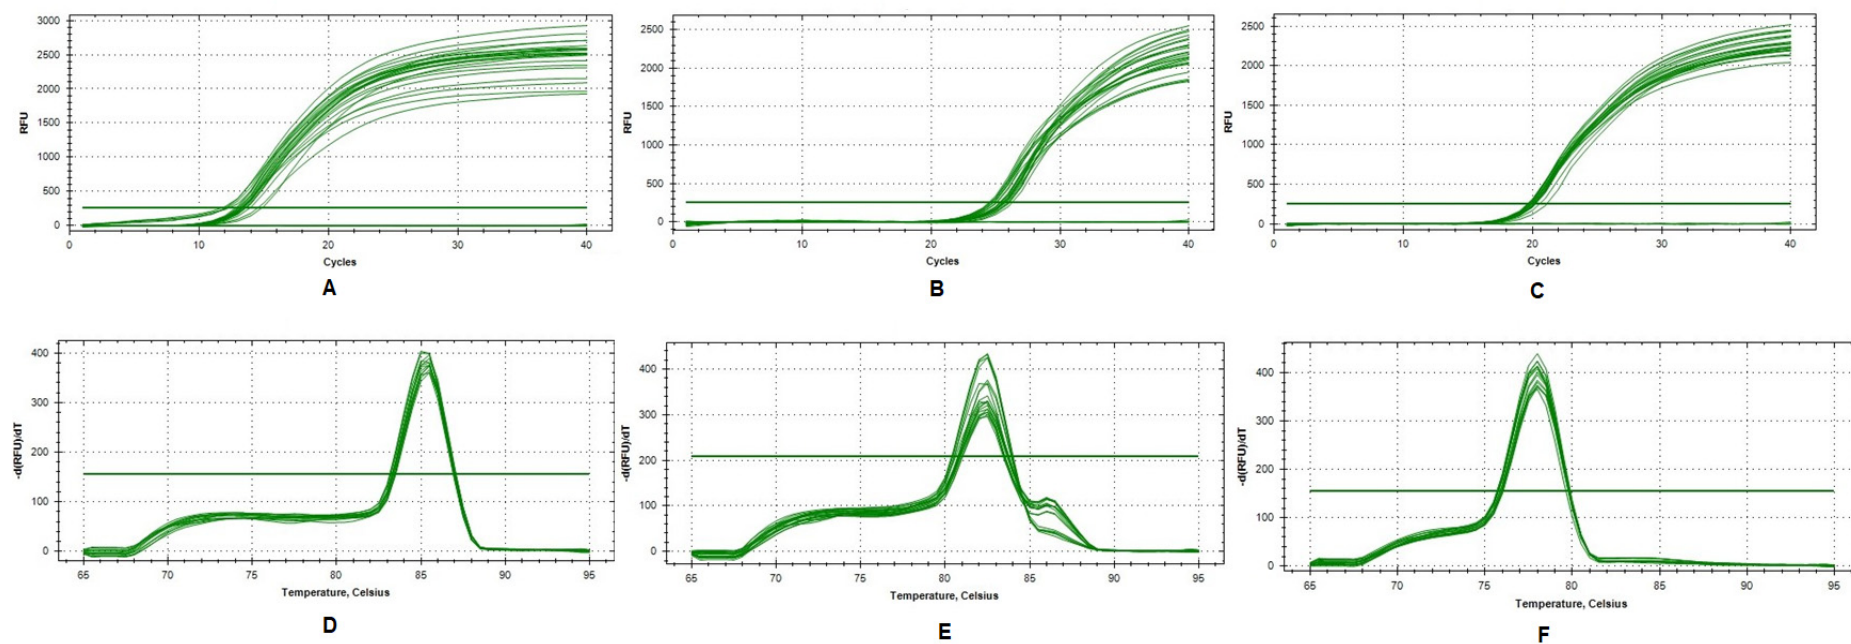

**Figure S2.** The examples of: the amplification curve plots for *GAPDH* (A), *HRAS* (B) and *KRAS* (C) genes including NTC and the melting curves of the real-time PCR amplification products of the *GAPDH* (D), *HRAS* (E) and *KRAS* (F) genes expressed as  $-\Delta(RFU)/\Delta T$  vs. temperature.

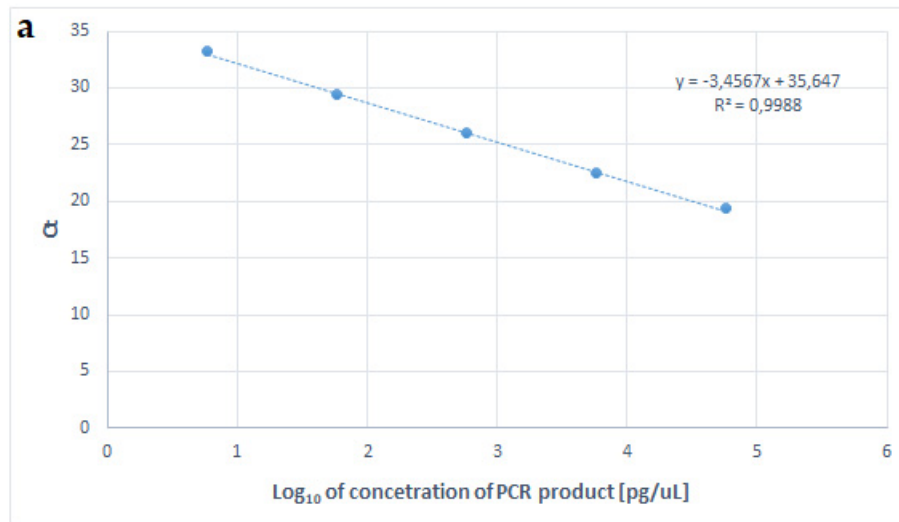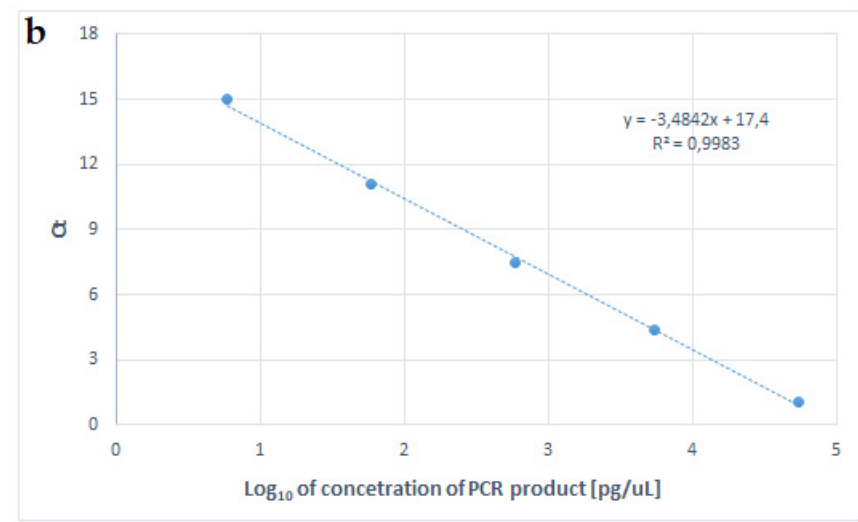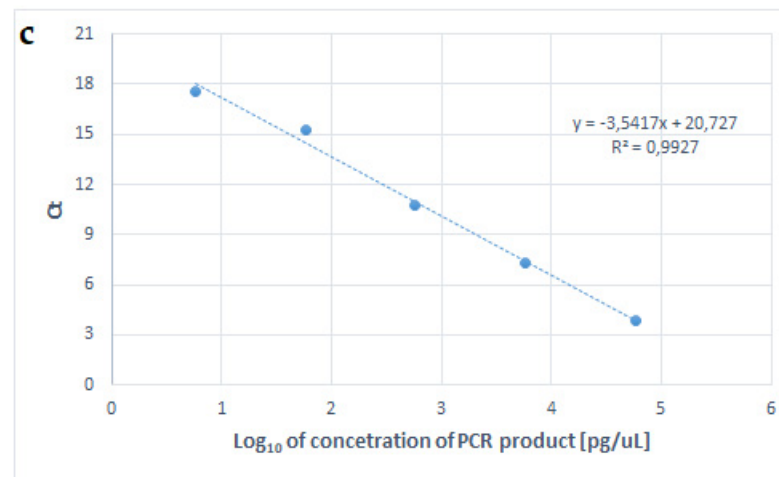

**Figure S3.** The examples of standard curve plots for (a) *GAPDH* (slope= -3.4567; E=1.95;  $R^2$  =0.9988), (b) *KRAS* (slope=-3.4842; E=1.94;  $R^2$ =0.9982), (c) *HRAS* (slope=-3.5417; E=1.92;  $R^2$ =0.9927) (x-axis: log<sub>10</sub> concentration of PCR product [pg/ $\mu$ L]; y-axis: Ct values).
